# Supplementary material for: Facile synthesis of crystalline viologen-based porous ionic polymers with hydrogen-bonded water for efficient catalytic CO2 fixation under ambient conditions
Source: Royal Society of Chemistry journal article supplement (doi:10.1039/c9ra09088f), 2020-01-01
Supplement: c9ra09088f1.pdf [file c9ra09088f1.pdf]

## Electronic Supplementary Information

### **Facile synthesis of crystalline viologen-based porous ionic polymers with hydrogen-bonded water for efficient catalytic CO<sub>2</sub> fixation at ambient conditions**

Yadong Zhang, Ke Zhang, Lei Wu, Ke Liu, Rui Huang, Zhouyang Long, Minman Tong\* and Guojian Chen\*

School of Chemistry and Materials Science, Jiangsu Key Laboratory of Green Synthetic Chemistry for Functional Materials, Jiangsu Normal University, Xuzhou 221116, China

\*E-mail: gjchen@jsnu.edu.cn (G. Chen); tongmm@jsnu.edu.cn (M. Tong).

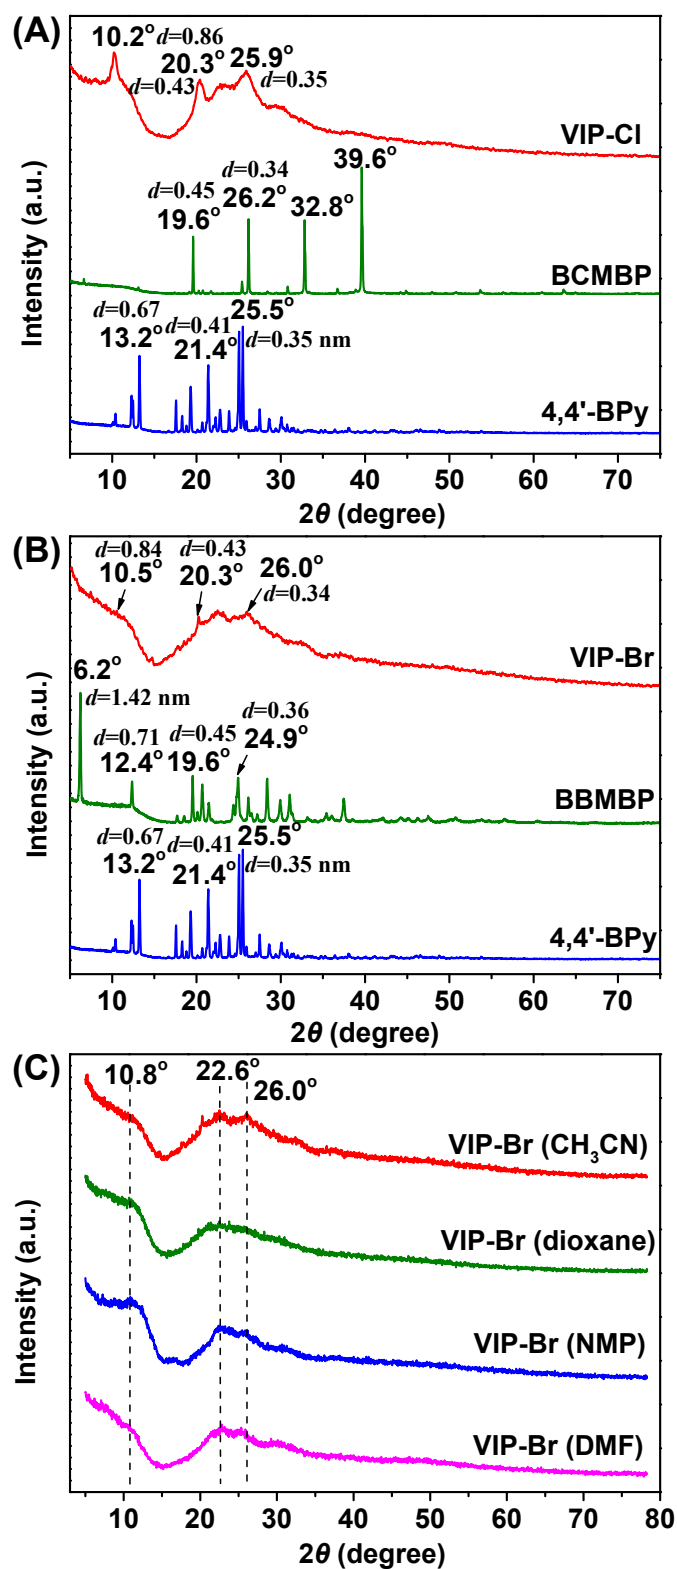

**Fig. S1** XRD patterns of (A) 4,4'-BPy, BCMBP and VIP-Cl, (B) 4,4'-BPy, BBMBP and VIP-Br prepared in  $\text{CH}_3\text{CN}$  and (C) VIP-Br series that were synthesized in different solvents.

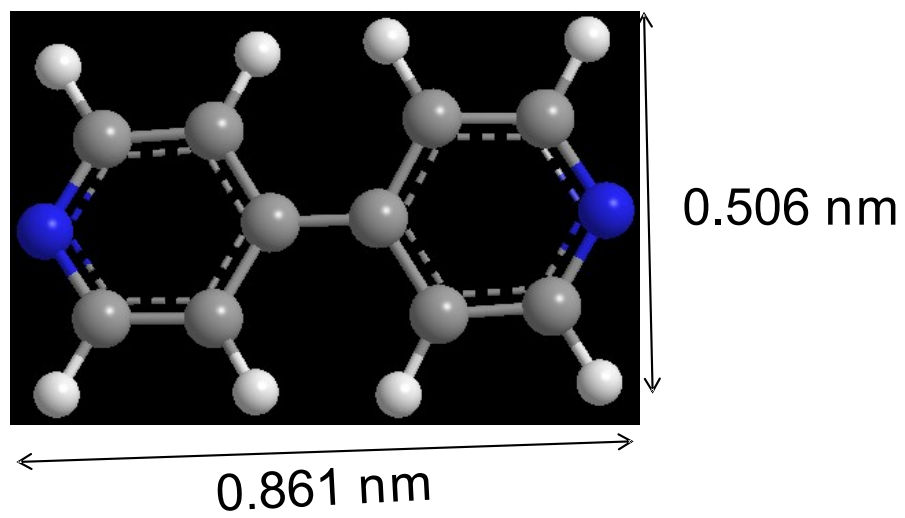

**Fig. S2** The optimized molecular structure of 4,4'-BPY (0.861 × 0.506 nm).

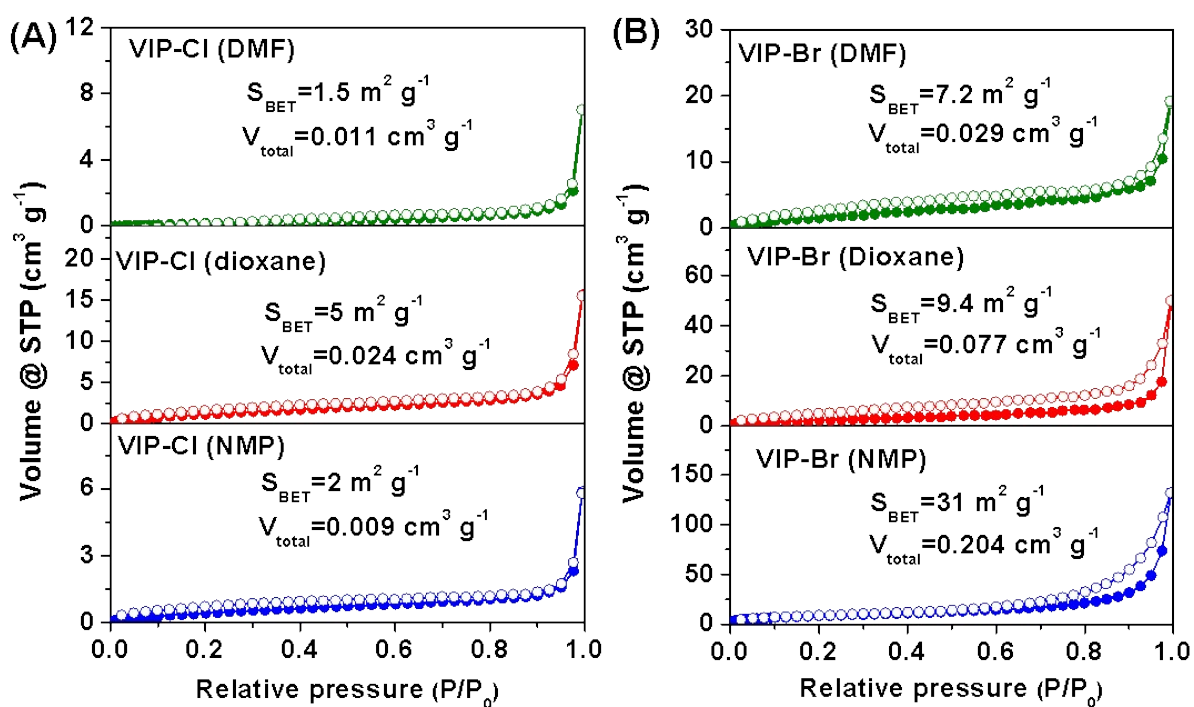

**Fig. S3**  $N_2$  adsorption-desorption isotherms of the control samples (A) VIP-CI (DMF), VIP-CI (Dioxane) and VIP-CI (NMP), (B) VIP-Br (DMF), VIP-Br (Dioxane) and VIP-Br (NMP).

**Table S1** The detailed comparisons for surface areas of viologen-based ionic polymers prepared by different synthetic methods.

| Entry    | Polymers                       | S <sub>BET</sub> (m <sup>2</sup> g <sup>-1</sup> ) | Synthetic method                              | Ref.             |
|----------|--------------------------------|----------------------------------------------------|-----------------------------------------------|------------------|
| <b>1</b> | <b>VIP-Cl</b>                  | <b>56</b>                                          | <b>Menshutkin reaction</b>                    | <b>This work</b> |
| <b>2</b> | <b>VIP-Br</b>                  | <b>38</b>                                          | <b>Menshutkin reaction</b>                    | <b>This work</b> |
| 3        | iCOP-1                         | 9.01                                               | Menshutkin reaction                           | S1               |
| 4        | iCOP-2                         | 12.93                                              | Menshutkin reaction                           | S1               |
| 5        | PIN-1                          | 2                                                  | Menshutkin reaction                           | S2               |
| 6        | COP <sub>1</sub> <sup>++</sup> | None                                               | Menshutkin reaction                           | S3               |
| 7        | TBB-Bpy-a                      | <10                                                | Menshutkin reaction                           | S4               |
| 8        | pDAP                           | 41                                                 | Menshutkin reaction                           | S5               |
| 9        | V-CDP                          | 22                                                 | Menshutkin reaction                           | S6               |
| 10       | bipy-POP                       | 25                                                 | Menshutkin reaction                           | S7               |
| 11       | COP <sub>2</sub> <sup>++</sup> | None                                               | Zincke reaction                               | S3               |
| 12       | HS                             | 12                                                 | Zincke reaction                               | S8               |
| 13       | HT                             | 35                                                 | Zincke reaction                               | S8               |
| 14       | cCTN:Cl <sup>-</sup>           | 30                                                 | Zincke reaction                               | S9               |
| 15       | COTs                           | 35                                                 | Zincke reaction                               | S10              |
| 16       | CONs                           | 153                                                | Zincke reaction                               | S10              |
| 17       | V-PCIF-Cl                      | 174                                                | Zincke reaction                               | S11              |
| 18       | V-PCIF-Br                      | 383                                                | Zincke reaction                               | S11              |
| 19       | POP-V1                         | 812                                                | Sonogashira-Hagihara reaction                 | S12              |
| 20       | PCP-Cl                         | 755                                                | Sonogashira-Hagihara reaction                 | S13              |
| 21       | V-iPHP-11                      | 562                                                | Heck reaction                                 | S14              |
| 22       | V-iPHP-21                      | 432                                                | Heck reaction                                 | S14              |
| 23       | cCTF-500                       | 1247                                               | Ionothermal reaction (ZnCl <sub>2</sub> )     | S15              |
| 24       | HCP-V1                         | 865                                                | Friedel-Crafts reactions (FeCl <sub>3</sub> ) | S16              |

**Table S2** Elemental analysis results of VIP-Cl and VIP-Br.

| Sample | Molecular formula                                                                                  | C (wt%)      | N (wt%)     | H (wt%)     | C/N   | H <sub>2</sub> O (wt%) <sup>a</sup> | V content (mmol g <sup>-1</sup> ) <sup>b</sup> |
|--------|----------------------------------------------------------------------------------------------------|--------------|-------------|-------------|-------|-------------------------------------|------------------------------------------------|
| VIP-Cl | [(C <sub>24</sub> H <sub>20</sub> N <sub>2</sub> Cl <sub>2</sub> )•4H <sub>2</sub> O] <sub>n</sub> | Found: 59.72 | Found: 5.77 | Found: 5.46 | 10.35 | 14.6                                | 2.06                                           |
|        |                                                                                                    | Calcd: 60.13 | Calcd: 5.84 | Calcd: 5.89 | 10.29 | 15.0                                | 2.08                                           |
| VIP-Br | [(C <sub>24</sub> H <sub>20</sub> N <sub>2</sub> Br <sub>2</sub> )•3H <sub>2</sub> O] <sub>n</sub> | Found: 52.08 | Found: 5.10 | Found: 4.10 | 10.21 | 8.5                                 | 1.82                                           |
|        |                                                                                                    | Calcd: 52.38 | Calcd: 5.09 | Calcd: 4.76 | 10.29 | 9.8                                 | 1.82                                           |

<sup>[a]</sup> The found content value of H<sub>2</sub>O was measured by the TGA result and theoretical value was calculated by the molecular formulas trapped H-bonded water. <sup>[b]</sup> Viologen (V) ionic content (mmol g<sup>-1</sup>) = 0.5 × 1000 × N content (wt %) / 14.

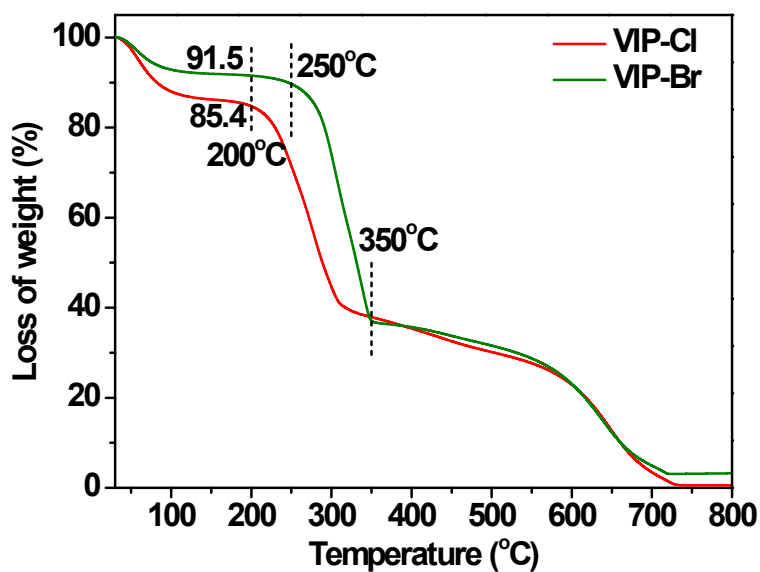**Fig. S4** Thermogravimetric analysis (TGA) curves of VIP-Cl and VIP-Br under N<sub>2</sub> atmosphere.

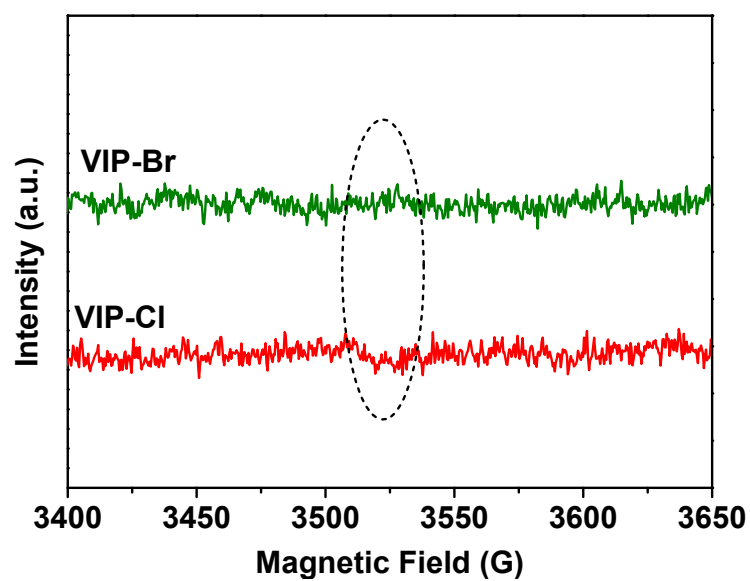

**Fig. S5** The solid-state EPR spectra at X-band at room temperature.

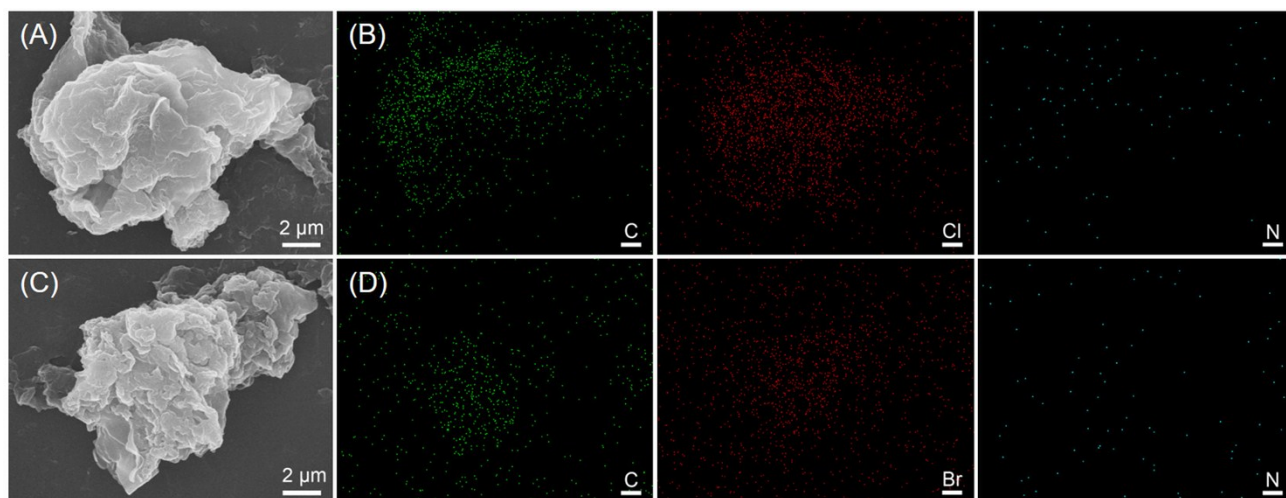

**Fig. S6** Energy-dispersive X-ray spectrometry (EDS) elemental mapping images of (A, B) VIP-Cl for C, Cl, N elements, and (C, D) VIP-Br for C, Br, N elements at the SEM mode.

**Table S3** The detailed comparisons of catalytic activities over metal-free ionic polymers and IPs with metal sites or HBD groups for CO<sub>2</sub> fixation with ECH without any co-catalysts.\*

| Catalyst                              | <i>P</i> (MPa) | <i>T</i> (°C)  | <i>t</i> (h)   | Yield (%)      | Ref.             |
|---------------------------------------|----------------|----------------|----------------|----------------|------------------|
| PCP-Cl                                | 3              | 100            | 12             | 98             | S13              |
| PS-DHPIMBr                            | 2              | 130            | 1              | 97             | S17              |
| PIM2                                  | 1              | 130            | 4              | 92             | S18              |
| IT-POP-1                              | 1              | 120            | 10             | 99             | S19              |
| poly-imidazoliums                     | 1              | 110            | 2              | 94             | S20              |
| POM3-IM                               | 1              | 120            | 8              | 90             | S21              |
| TBB-Bpy-a                             | 1              | 120            | 4              | 88             | S4               |
| cCTF-500                              | 1              | 90             | 12             | 95             | S15              |
| FIP-Im                                | 1              | 80             | 10             | 99             | S22              |
| 3-IPMP-EtI                            | 1              | 90             | 5              | 90             | S23              |
| UIIP                                  | 1              | 90             | 2              | 99             | S24              |
| CCTF-350                              | 0.1            | 120            | 24             | 93.1           | S25              |
| PDMBR                                 | 0.1            | 120            | 12             | 91.3           | S26              |
| IP3                                   | 0.1            | 100            | 24             | 99             | S27              |
| PDBA-Cl-SCD                           | 0.1            | 90             | 6              | 99.3           | S28              |
| PGDBr-5-2OH                           | 0.1            | 70             | 24             | 91             | S29              |
| HIP-Br-2                              | 0.1            | 70             | 96             | 90             | S30              |
| PIP-Bn-Cl                             | 0.1            | 100            | 3              | 99             | S31              |
| V-PCIF-Br                             | 0.1            | 80             | 72             | 97             | S11              |
| V-iPHP-1                              | 0.1            | 60             | 72             | 99             | S14              |
| IM-iPHP-2                             | 0.1            | 60             | 72             | 99             | S32              |
| PPS-mOH-Bn                            | 0.1            | 50             | 72             | 78             | S33              |
| POF-PNA-Br                            | 0.1            | 40             | 48             | 94.1           | S34              |
| <b>VIP-Br</b>                         | <b>0.1</b>     | <b>60 (40)</b> | <b>48 (72)</b> | <b>99 (99)</b> | <b>This work</b> |
| TBB-Bpy@Salen-Co                      | 1              | 80             | 6              | 95             | S35              |
| Al-iPOP-1                             | 1              | 40             | 6              | 99             | S36              |
| SYSU-Zn@IL2                           | 1              | 80             | 12             | 99             | S37              |
| Al-CPOP                               | 0.1            | 120            | 24             | 95             | S38              |
| POF-Zn <sup>2+</sup> -I <sup>-</sup>  | 1              | 60             | 8              | 92.2           | S39              |
| NHC-CAP-1(Zn <sup>2+</sup> )          | 2              | 100            | 3              | 97             | S40              |
| Zn-CIF2-C <sub>2</sub> H <sub>4</sub> | 2.5            | 120            | 4              | 98             | S41              |

\* It should be pointed out that different catalysts were evaluated under different conditions. Thus, it is difficult to directly compare the activity between different catalytic systems. The represented catalytic activities using yields of the product in Table S3 should be considered in a reasonable comparison.



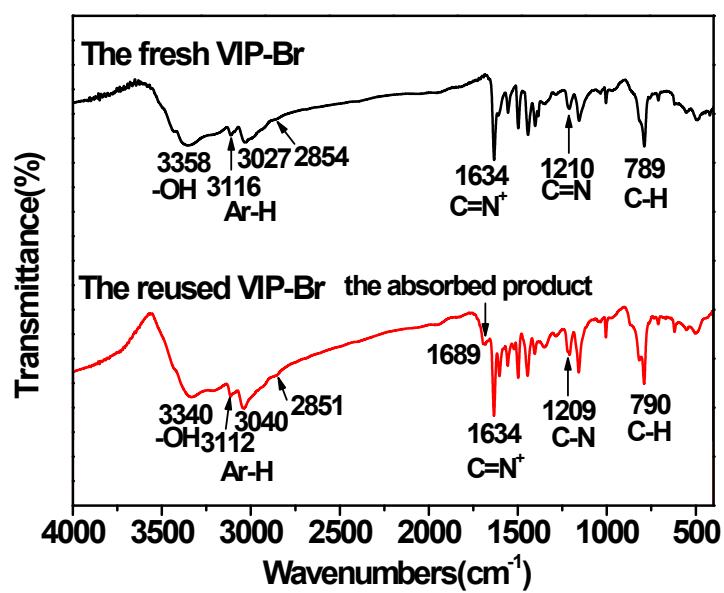

Fig. S7 FTIR of the fresh catalyst VIP-Br and the reused catalyst VIP-Br.

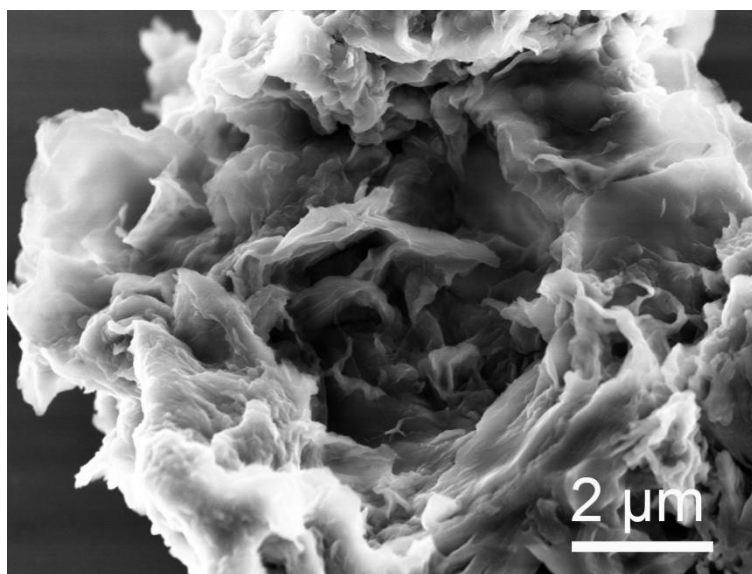

Fig. S8 SEM image of the reused catalyst VIP-Br.

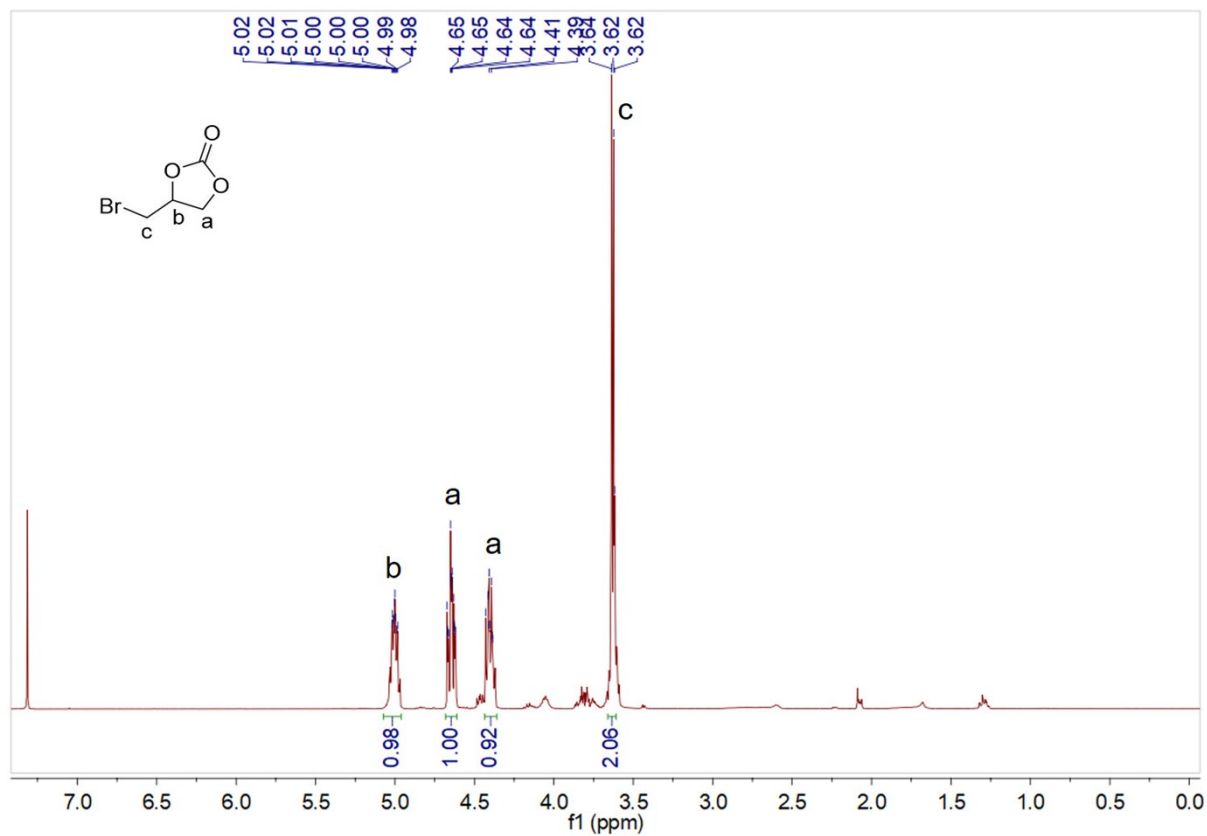

**Fig. S9** <sup>1</sup>H NMR spectrum of 4-(bromomethyl)-1,3-dioxolan-2-one (400 MHz, CDCl<sub>3</sub>): δ=5.00 (1H, CH), 4.68-4.61 (1H, CH<sub>2</sub>), 4.40 (1H, CH<sub>2</sub>), 3.66-3.61 (2H, CH<sub>2</sub>).

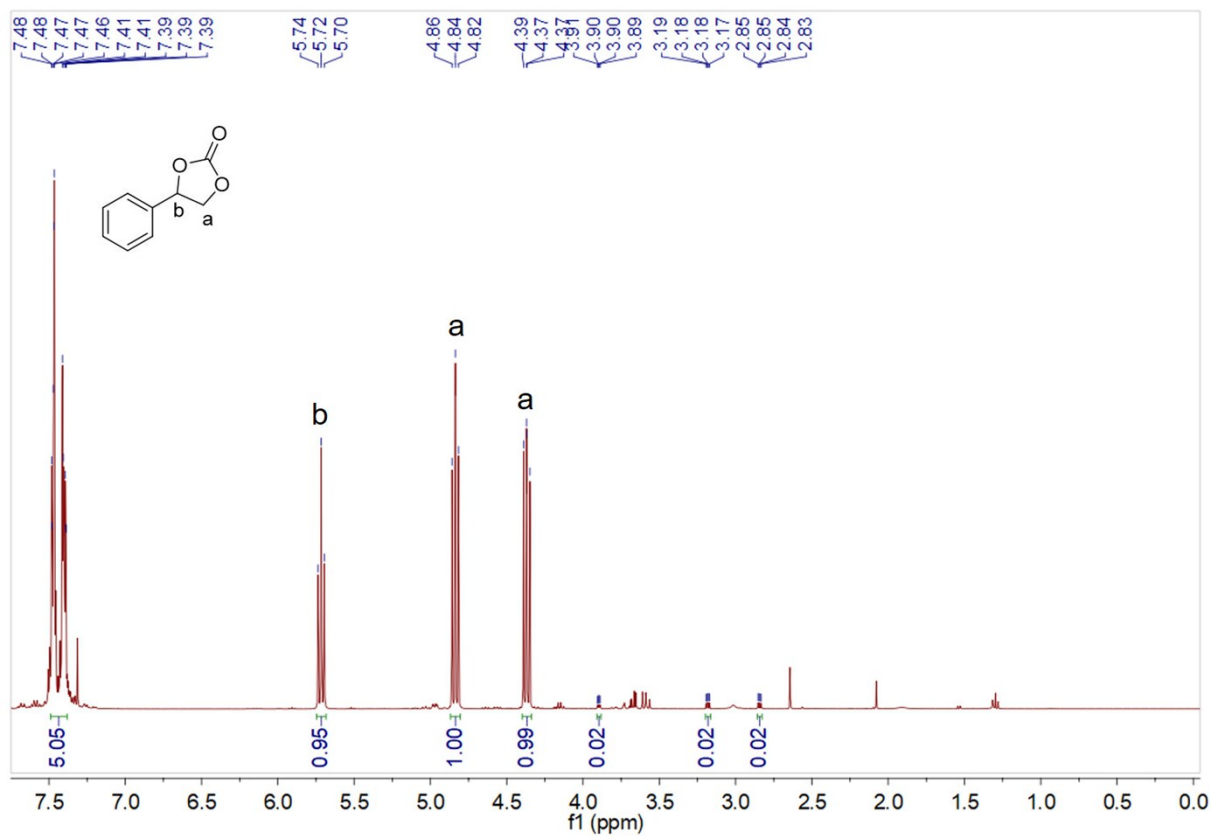

**Fig. S10** <sup>1</sup>H NMR spectrum of 4-phenyl-1,3-dioxolan-2-one (400 MHz, CDCl<sub>3</sub>):  $\delta$ =7.49-7.38 (5H, CH), 5.72 (1H, CH<sub>2</sub>), 4.87-4.80(1H, CH<sub>2</sub>), 4.37 (1H, CH<sub>2</sub>).

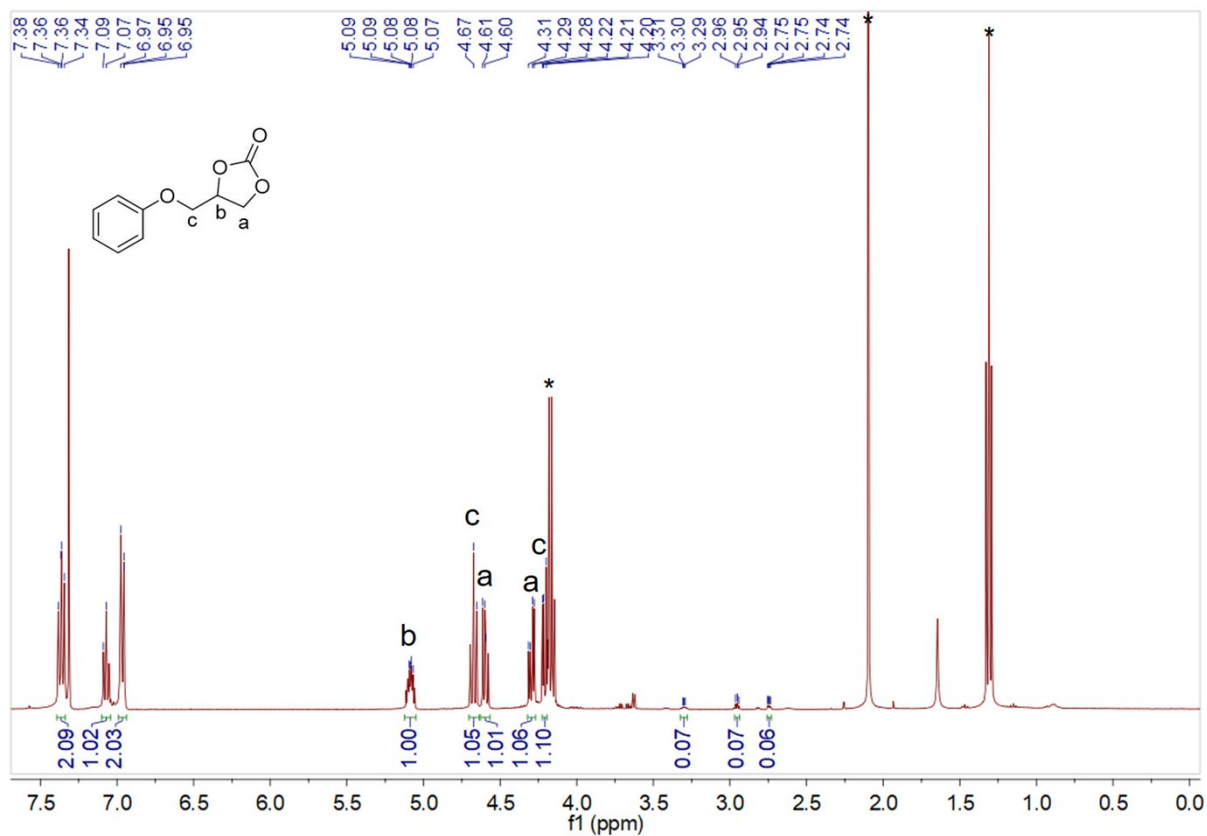

**Fig. S11** <sup>1</sup>H NMR spectrum of 4-(phenoxy)methyl-1,3-dioxolan-2-one (400 MHz, CDCl<sub>3</sub>): δ=7.36 (2H, CH), 7.08 (1H, CH), 6.99–6.94 (2H, CH), 5.12–5.05 (1H, CH), 4.66 (1H, CH<sub>2</sub>), 4.63–4.57 (1H, CH<sub>2</sub>), 4.30 (1H, CH<sub>2</sub>), 4.23–4.19 (1H, CH<sub>2</sub>).

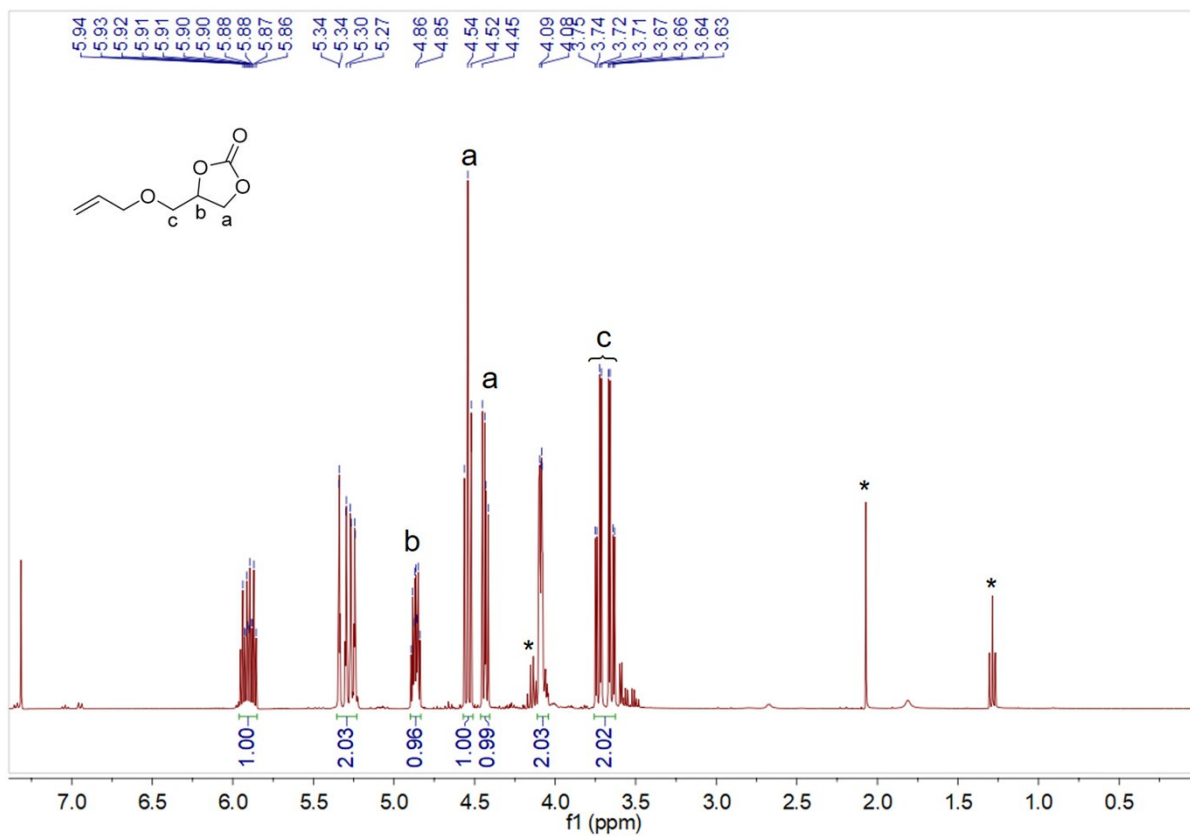

**Fig. S12** <sup>1</sup>H NMR spectrum of allyloxymethyl-1,3-dioxolan-2-one (400 MHz, CDCl<sub>3</sub>): δ=5.96-5.85 (1H, CH), 5.36-5.23 (2H, CH<sub>2</sub>), 4.90-4.83 (1H, CH), 4.54 (1H, CH<sub>2</sub>), 4.43 (1H, CH<sub>2</sub>), 4.09 (2H, CH<sub>2</sub>), 3.69 (2H, CH<sub>2</sub>)

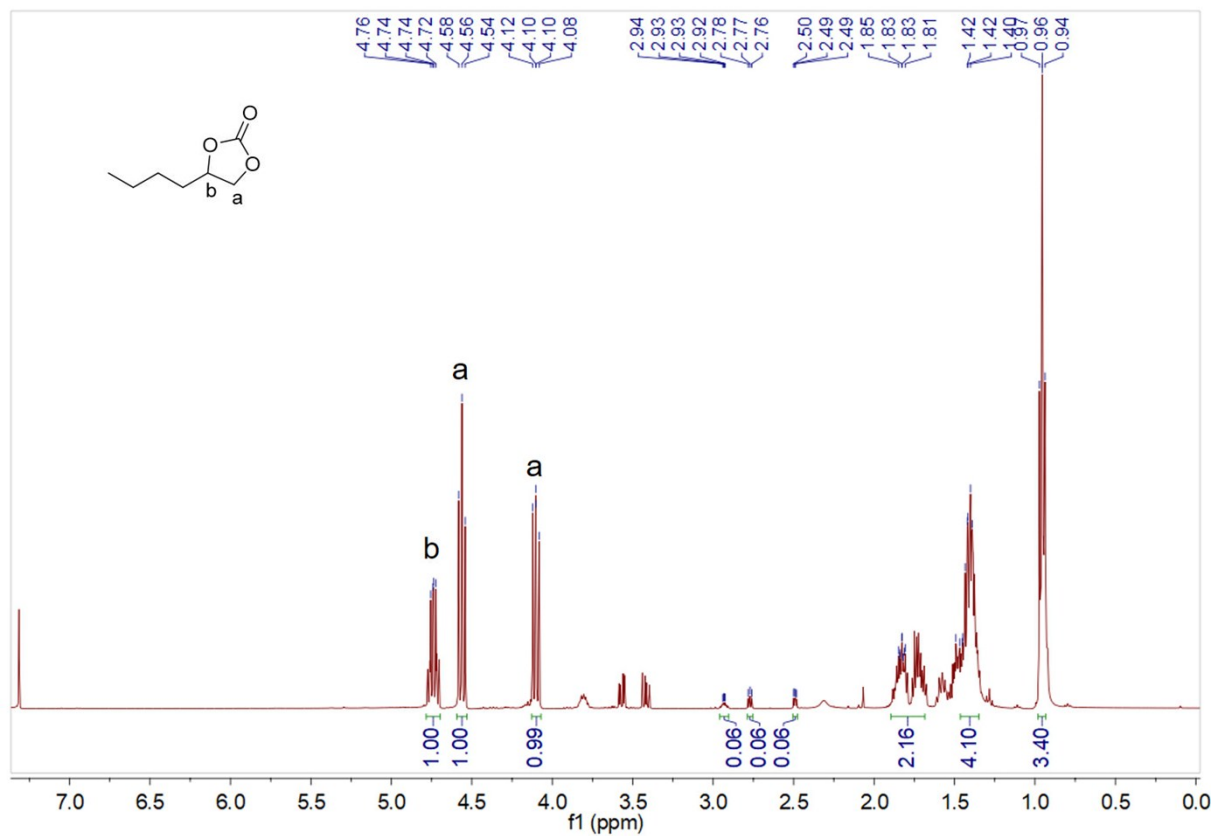

**Fig. S13**  $^1\text{H}$  NMR spectrum of 4-butyl-1,3-dioxolan-2-one (400 MHz,  $\text{CDCl}_3$ ):  $\delta=4.74$  (1H,  $\text{CH}_2$ ), 4.56 (1H,  $\text{CH}_2$ ), 4.10 (1H,  $\text{CH}_2$ ), 1.83 (2H,  $\text{CH}_2$ ), 1.42 (4H,  $\text{CH}_2$ ), 0.95 (3H,  $\text{CH}_3$ ).

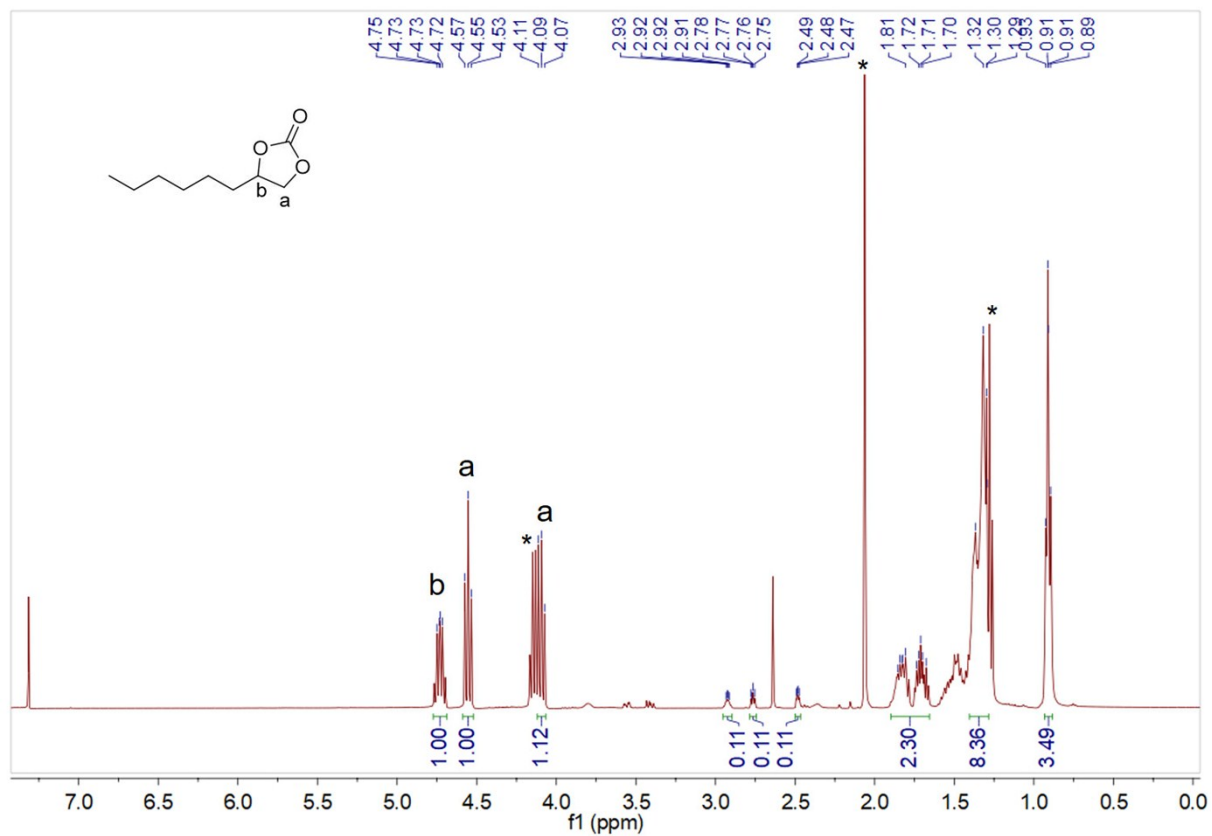

**Fig. S14**  $^1\text{H}$  NMR spectrum of 4-hexyl-1,3-dioxolan-2-one (400 MHz,  $\text{CDCl}_3$ ):  $\delta=4.73$  (1H, CH<sub>2</sub>), 4.55 (1H, CH<sub>2</sub>), 4.12-4.07(1H, CH<sub>2</sub>), 1.90-1.66 (2H, CH<sub>2</sub>), 1.33 (8H, CH<sub>2</sub>), 0.91 (3H, CH<sub>3</sub>).

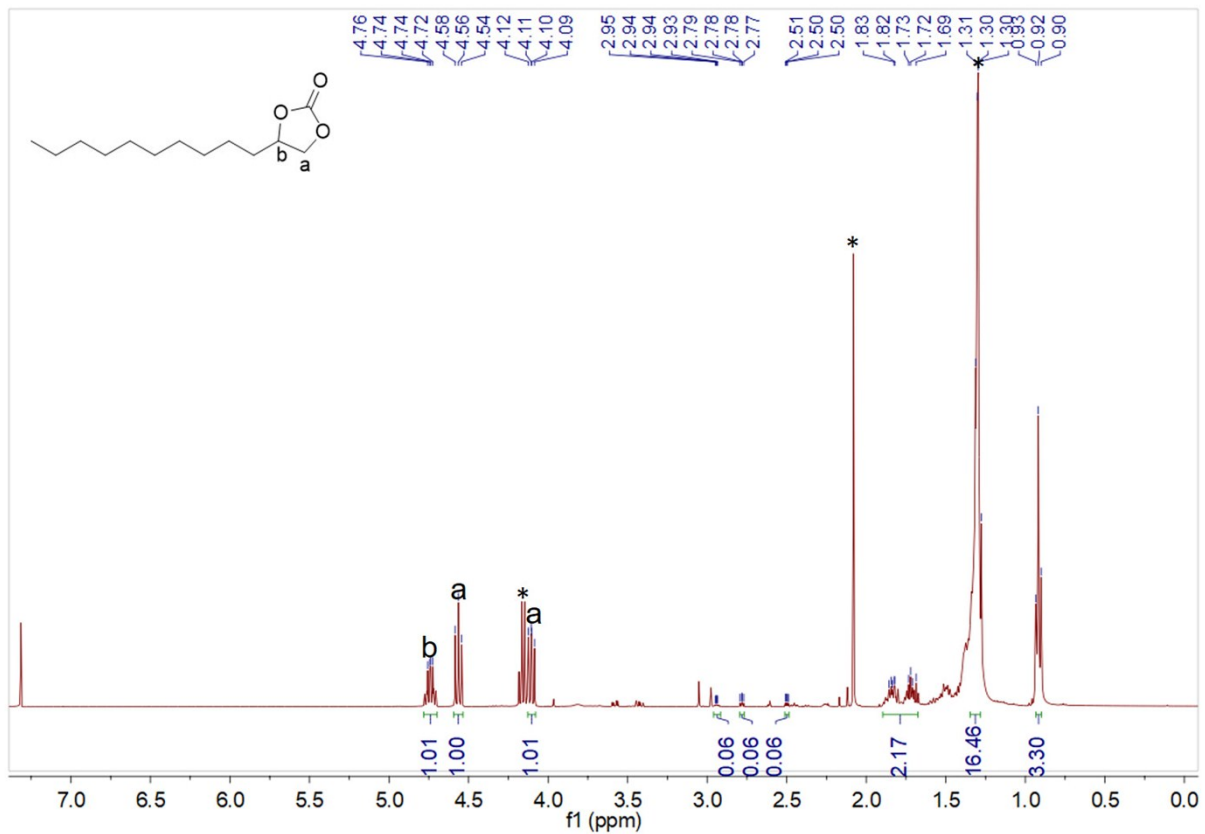

**Fig. S15** <sup>1</sup>H NMR spectrum of 4-decyl-1,3-dioxolan-2-one (400 MHz, CDCl<sub>3</sub>): δ=4.74 (1H, CH<sub>2</sub>), 4.56 (1H, CH<sub>2</sub>), 4.10 (1H, CH<sub>2</sub>), 1.90-1.68 (2H, CH<sub>2</sub>), 1.35-1.28 (16H, CH<sub>2</sub>), 0.91 (3H, CH<sub>3</sub>).



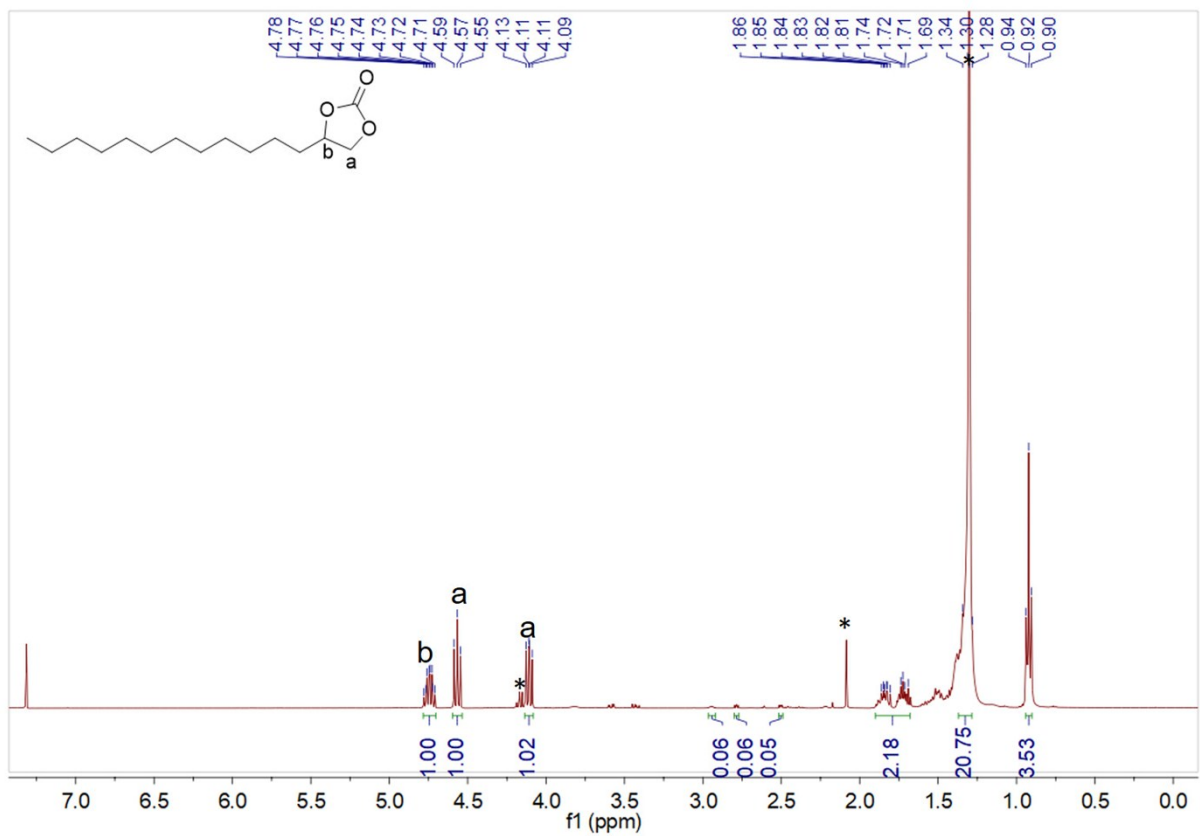

**Fig. S16**  $^1\text{H}$  NMR spectrum of 4-dodecyl-1,3-dioxolan-2-one (400 MHz,  $\text{CDCl}_3$ ):  $\delta=4.74$  (1H,  $\text{CH}_2$ ), 4.57 (1H,  $\text{CH}_2$ ), 4.11 (1H,  $\text{CH}_2$ ), 1.90-1.68 (2H,  $\text{CH}_2$ ), 1.32 (16H,  $\text{CH}_2$ ), 0.92 (3H,  $\text{CH}_3$ ).

## References

- S1 A. A. Rajaa and C. T. Yavuz, *RSC Adv.*, 2014, **4**, 59779-59784.
- S2 S. Hou, N. Chen, P. Zhang and S. Dai, *Green Chem.*, 2019, **21**, 1455-1460.
- S3 G. Das, T. Prakasam, S. Nuryyeva, D. S. Han, A. Abdel-Wahab, J.-C. Olsen, K. Polychronopoulou, C. Platas-Iglesias, F. Ravaux, M. Jouiad and A. Trabolsi, *J. Mater. Chem. A*, 2016, **4**, 15361-15369.
- S4 Y. Leng, D. Lu, P. Jiang, C. Zhang, J. Zhao and W. Zhang, *Catal. Commun.*, 2016, **74**, 99-103.
- S5 K. Kim, O. Buyukcakir and A. Coskun, *RSC Adv.*, 2016, **6**, 77406-77409.
- S6 X. Li, M. Zhou, J. Jia and Q. Jia, *React. Funct. Polym.*, 2018, **126**, 20-26.
- S7 J.-K. Tang, S.-B. Yu, C.-Z. Liu, H. Wang, D.-W. Zhang, Z.-T. Li, *Asian J. Org. Chem.*, 2019, **8**, 1912-1918.
- S8 G. Das, T. Skorjanc, S. K. Sharma, F. Gandará, M. Lusi, D. S. S. Rao, S. Vimala, S. K. Prasad, J. Raya, D. S. Han, R. Jagannathan, J.-C. Olsen and A. Trabolsi, *J. Am. Chem. Soc.*, 2017, **139**, 9558-9565.
- S9 L.-Z. Peng, P. Liu, Q.-Q. Cheng, W.-J. Hu, Y. A. Liu, J.-S. Li, B. Jiang, X.-S. Jia, H. Yang and K. Wen, *Chem. Commun.*, 2018, **54**, 4433-4436.
- S10 G. Das, T. Skorjanc, S. K. Sharma, T. Prakasam, C. P. Iglesias, D. S. Han, J. Raya, J.-C. Olsen, R. Jagannathan and A. Trabolsi, *ChemNanoMat*, 2018, **4**, 61-65.
- S11 G. Chen, X. Huang, Y. Zhang, M. Sun, J. Shen, R. Huang, M. Tong, Z. Long and X. Wang, *Chem. Commun.*, 2018, **54**, 12174-12177.
- S12 C. Hua, B. Chan, A. Rawal, F. Tuna, D. Collison, J. M. Hook and D. M. D'Alessandro, *J. Mater. Chem. C*, 2016, **4**, 2535-2544.
- S13 O. Buyukcakir, S. H. Je, D. S. Choi, S. N. Talapaneni, Y. Seo, Y. Jung, K. Polychronopoulou and A. Coskun, *Chem. Commun.*, 2016, **52**, 934-937.
- S14 Y. Zhang, K. Liu, L. Wu, H. Zhong, N. Luo, Y. Zhu, M. Tong, Z. Long and G. Chen, *ACS Sustainable Chem. Eng.*, 2019, **7**, 16907-16916.
- S15 O. Buyukcakir, S. H. Je, S. N. Talapaneni, D. Kim and A. Coskun, *ACS Appl. Mater. Interfaces*, 2017, **9**, 7209-7216.
- S16 X. Li, G. Chen and Q. Jia, *Micropor. Mesopor. Mater.*, 2019, **279**, 186-192.
- S17 R.A. Watile, K. M. Deshmukh, K. P. Dhake and B. M. Bhanage, *Catal. Sci. Technol.*, 2012, **2**, 1051-1055.
- S18 Y. Wang, J. Nie, C. Lu, F. Wang, C. Ma, Z. Chen and G. Yang, *Micropor. Mesopor. Mater.*, 2020, **292**, 109751.
- S19 H. Zhong, Y. Su, X. Chen, X. Li, R. Wang, *ChemSusChem*, 2017, **10**, 4855-4863.

- S20 J. Wang, J. Leong and Y. Zhang, *Green Chem.*, 2014, **16**, 4515-4519.
- S21 J. Wang, W. Sng, G. Yi and Y. Zhang, *Chem. Commun.*, 2015, **51**, 12076-12079.
- S22 Y. Chen, R. Luo, J. Bao, Q. Xu, J. Jiang, X. Zhou and H. Ji, *J. Mater. Chem. A*, 2018, **6**, 9172-9182.
- S23 W. Zhang, Y. Mei, P. Wu, H.-H. Wu and M.-Y. He, *Catal. Sci. Technol.*, 2019, **9**, 1030-1038.
- S24 M. A. Ziaee, Y. Tang, H. Zhong, D. Tian and R. Wang, *ACS Sustainable Chem. Eng.*, 2019, **7**, 2380-2387.
- S25 T.-T. Liu, R. Xu, J.-D. Yi, J. Liang, X.-S. Wang, P.-C. Shi, Y.-B. Huang and R. Cao, *ChemCatChem*, 2018, **10**, 2036-2040.
- S26 X. Wang, Y. Zhou, Z. Guo, G. Chen, J. Li, Y. Shi, Y. Liu and J. Wang, *Chem. Sci.*, 2015, **6**, 6916-6924.
- S27 W. Zhong, F. D. Bobbink, Z. Fei and P. J. Dyson, *ChemSusChem*, 2017, **10**, 2728-2735.
- S28 Y. Xie, Q. Sun, Y. Fu, L. Song, J. Liang, X. Xu, H. Wang, J. Li, S. Tu, X. Lu and J. Li, *J. Mater. Chem. A*, 2017, **5**, 25594-25600.
- S29 Z. Guo, Q. Jiang, Y. Shi, J. Li, X. Yang, W. Hou, Y. Zhou and J. Wang, *ACS Catal.*, 2017, **7**, 6770-6780.
- S30 J. Li, D. Jia, Z. Guo, Y. Liu, Y. Lyu, Y. Zhou and J. Wang, *Green Chem.*, 2017, **19**, 2675-2686.
- S31 Q. Sun, Y. Jin, B. Aguila, X. Meng, S. Ma and F.-S. Xiao, *ChemSusChem*, 2017, **10**, 1160-1165.
- S32 G. Chen, Y. Zhang, J. Xu, X. Liu, K. Liu, M. Tong and Z. Long, *Chem. Eng. J.*, 2020, **381**, 122765.
- S33 K. Hu, Y. Tang, J. Cui, Q. Gong, C. Hu, S. Wang, K. Dong, X. Meng, Q. Sun and F.-S. Xiao, *Chem. Commun.*, 2019, **55**, 9180-9183.
- S34 D. Ma, K. Liu, J. Li and Z. Shi, *ACS Sustainable Chem. Eng.*, 2018, **6**, 15050-15055.
- S35 Y. Leng, D. Lu, C. Zhang, P. Jiang, W. Zhang and J. Wang, *Chem. Eur. J.*, 2016, **22**, 8368-8375.
- S36 Y. Chen, R. Luo, Q. Xu, J. Jiang, X. Zhou and H. Ji, *ChemSusChem*, 2017, **10**, 2534-2541.
- S37 Y. Chen, R. Luo, Q. Xu, J. Jiang, X. Zhou and H. Ji, *ACS Sustainable Chem. Eng.*, 2018, **6**, 1074-1082.
- S38 T.-T. Liu, Jun Liang, Y.-B. Huang and R. Cao, *Chem. Commun.*, 2016, **52**, 13288-13291.
- S39 D. Ma, J. Li, K. Liu, B. Li, C. Li and Z. Shi, *Green Chem.*, 2018, **20**, 5285-5291.
- S40 P. Puthiaraj, S. Ravi, K. Yu and W.-S. Ahn, *Appl. Catal. B*, 2019, **251**, 195-205.
- S41 J. Liu, G. Zhao, O. Cheung, L. Jia, Z. Sun and S. Zhang, *Chem. Eur. J.*, 2019, **25**, 9052-9059.
